# Supplementary material for: Corrosion Products Formed on MgZr Alloy Embedded in Geopolymer Used as Conditioning Matrix for Nuclear Waste—A Proposition of Interconnected Processes
Source: MDPI journal article supplement (doi:10.3390/ma14082017), 2021-04-16
Supplement: s1 [file s1]

## Article

# Corrosion Products Formed on MgZr Alloy Embedded in Geopolymer Used as Conditioning Matrix for Nuclear Waste—A Proposition of Interconnected Processes

Rémi Boubon <sup>1</sup>, Jaysen Nelayah <sup>2</sup>, Samuel Tardif <sup>3</sup>, Xavier Deschanel <sup>1</sup> and Diane Rébiscoul <sup>1,\*</sup>

<sup>1</sup> ICSM, Université Montpellier, CEA, CNRS, ENSCM, Marcoule, 30207 Bagnols-sur-Cèze, France; remi.boubon@cea.fr (R.B.); xavier.deschanel@cea.fr (X.D.)

<sup>2</sup> Laboratoire Matériaux et Phénomènes Quantiques, Université de Paris, CNRS, 75013 Paris, France; jaysen.nelayah@u-paris.fr

<sup>3</sup> Université Grenoble Alpes, CEA, IRIG-MEM, F-38000 Grenoble, France; samuel.tardif@cea.fr

\* Correspondence: diane.rebiscoul@cea.fr

Penetration depth of the X-ray beam at 27 keV at a function of the incident angles

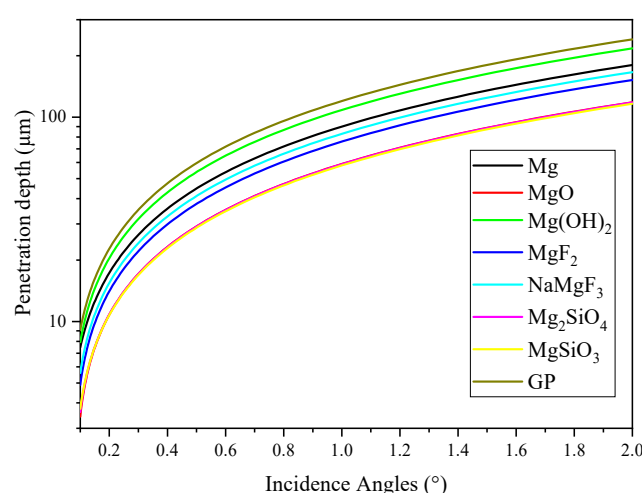

**Figure S1.** Penetration depth of the X-ray beam at 27 keV at a function of the incident angles.

XRD analyses of two MgZr samples: highlight of various crystallographic grain orientations

**Citation:** Boubon, R.; Nelayah, J.; Tardif, S.; Deschanel, X.; Rébiscoul, D. Corrosion Products Formed on MgZr Alloy Embedded in Geopolymer Used as Conditioning Matrix for Nuclear Waste—A Proposition of Interconnected Processes. *Materials* **2021**, *14*, 2017. <https://doi.org/10.3390/ma14082017>

Academic Editor: Herman Potgieter

Received: 15 March 2021

Accepted: 8 April 2021

Published: 16 April 2021

**Publisher's Note:** MDPI stays neutral with regard to jurisdictional claims in published maps and institutional affiliations.

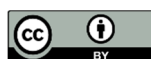

**Copyright:** © 2021 by the authors. Submitted for possible open access publication under the terms and conditions of the Creative Commons Attribution (CC BY) license (<http://creativecommons.org/licenses/by/4.0/>).

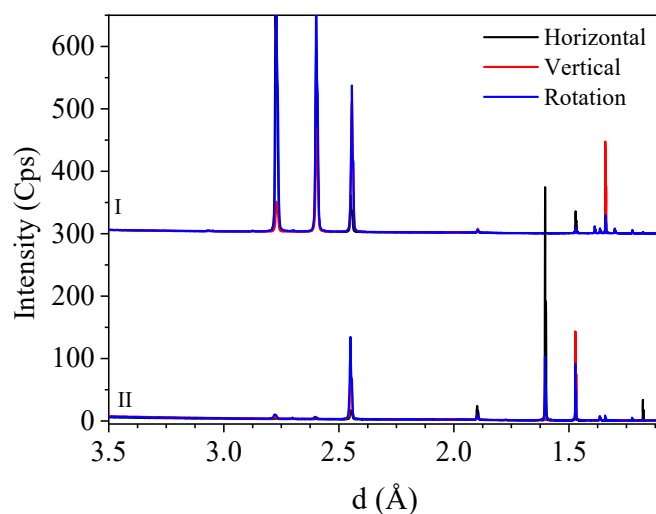

**Figure S2.** XRD patterns of two MgZr substrates analyzed in different position.

**Table S1.** Summary of the results obtained by statistical analysis of dataset from image analysis.

|                              | GP      | GP-NaF<br>image (c) | GP-NaF<br>image (d) | GP-NaF<br>image (e) |
|------------------------------|---------|---------------------|---------------------|---------------------|
| N total                      | 9874.00 | 4103                | 2352                | 2183                |
| Mean (nm)                    | 13.63   | 10.50               | 7.82                | 10.80               |
| Standard Devia-<br>tion (nm) | 18.71   | 13.1                | 7.56                | 6.61                |
| Lower 95% CI of<br>Mean (nm) | 13.26   | 10.10               | 8.09                | 10.52               |
| Upper 95% CI of<br>Mean (nm) | 14.00   | 10.90               | 8.09                | 11.08               |
| Variance                     | 349.99  | 173.31              | 44.31               | 43.8                |
| SD times 2                   | 37.42   | 26.32               | 13.31               | 13.23               |
| SD times 3                   | 56.12   | 39.49               | 19.69               | 19.85               |
| Minimum (nm)                 | 1.22    | 1.63                | 1.62                | 2.58                |
| 1st Quartile (Q1)<br>(nm)    | 2.82    | 2.81                | 3.63                | 5.78                |
| Median (nm)                  | 8.47    | 6.50                | 6.08                | 9.68                |
| 3rd Quartile (Q3)<br>(nm)    | 17.84   | 13.11               | 10.01               | 14.41               |
| Maximum (nm)                 | 822.63  | 229.89              | 13.56               | 79.78               |

## References of Supplementary Data

1. X-Ray Attenuation Length. Available online: [http://henke.lbl.gov/optical\\_constants/atten2.html](http://henke.lbl.gov/optical_constants/atten2.html) (accessed on 3 February, 2020).
2. Henke, B.L.; Gullikson, E.M.; Davis, J.C. X-ray interactions: Photoabsorption, scattering, transmission, and reflection at E = 50–30,000 eV, Z = 1–92. *At. Data Nucl. Data Tables* **1993**, *54*, 181–342, doi:10.1006/adnd.1993.1013.
